# Supplementary material for: Food Choice and Waste in University Dining Commons—A Menus of Change University Research Collaborative Study
Source: PubMed Central journal article supplement (PMC8000212; doi:10.3390/foods10030577), 2021-03-10
Supplement: foods-10-00577-s001.pdf [file foods-10-00577-s001.pdf]

**Table S1.** The questions that were asked in the order they were presented in the survey.

| Info         | Question                                                                                                                                                                                                                                                                                                                                                            | Asked Per | Question Type                    | Options                                                                                                                                                       |
|--------------|---------------------------------------------------------------------------------------------------------------------------------------------------------------------------------------------------------------------------------------------------------------------------------------------------------------------------------------------------------------------|-----------|----------------------------------|---------------------------------------------------------------------------------------------------------------------------------------------------------------|
| Before Photo | Please take a picture of your plate (before you start eating), and upload it using the button below. If you have more than one plate, please try to take a picture of all of your food together. Don't worry about taking a picture if you go back for more, we will ask you about that in the questions that follow.                                               | Person    | Photo                            | N/A                                                                                                                                                           |
| Items        | Please tell us what you chose to eat today (in your words, so we can use it for subsequent questions). If you have more items than spaces for them, please just write the most significant ones in the spaces provided. Please focus on main dishes and sides (rather than drinks or desserts). Please write down at least one item, and up to six different items. | Person    | Open-Ended                       | N/A                                                                                                                                                           |
| Reason       | Please tell us why you chose the items on your plate today. Select all that apply:                                                                                                                                                                                                                                                                                  | Item      | Check-all-that-apply categorical | Looked good<br>Smelled good<br>Liked Description<br>I've had before<br>It was quick<br>Met my nutritional goals<br>Other<br>Pre-plated<br>Someone else served |
| Choice       | Please tell us how you chose the quantities of food you took today. Select all that apply:                                                                                                                                                                                                                                                                          | Item      | Check-all-that-apply categorical | Suggested amount<br>Based on my hunger<br>Liking of food<br>I didn't want to get up again<br>Other                                                            |
| Confidence   | How confident were you that you would like this item before you took it?                                                                                                                                                                                                                                                                                            | Item      | Ordered categorical              | Not at all certain<br>Slightly certain<br>Moderately certain<br>Very certain<br>Extremely certain                                                             |
| Go Back      | How likely are you to go back for more (of any item) if you like it?                                                                                                                                                                                                                                                                                                | Person    | Ordered categorical              | Extremely unlikely<br>Somewhat unlikely<br>Neither likely nor unlikely<br>Somewhat likely<br>Extremely likely                                                 |
| After Photo  | Please take a picture of your plate when you are finished eating, and upload it using the button below.                                                                                                                                                                                                                                                             | Person    | Photo                            | N/A                                                                                                                                                           |

Please try to show us whatever food is left on the plate.

|              |                                                                                |        |                     |                                                                                                                                                                                                                                                                                                                                                   |
|--------------|--------------------------------------------------------------------------------|--------|---------------------|---------------------------------------------------------------------------------------------------------------------------------------------------------------------------------------------------------------------------------------------------------------------------------------------------------------------------------------------------|
| Disposal     | Why did you choose not to finish (if you did not) each of the following items? | Item   | Categorical         | <ul style="list-style-type: none"> <li>Did not like</li> <li>Not hungry</li> <li>Did not meet food goals</li> <li>Saved for later</li> <li>Other</li> <li>Finished</li> <li>Extremely dissatisfied</li> <li>Somewhat dissatisfied</li> <li>Neither satisfied nor dissatisfied</li> <li>Somewhat satisfied</li> <li>Extremely satisfied</li> </ul> |
| Satisfaction | How satisfied were you with your meal today?                                   | Person | Ordered categorical | <ul style="list-style-type: none"> <li>Student</li> <li>Staff</li> <li>Faculty</li> <li>Visitor</li> <li>Other</li> <li>Less than once a week</li> <li>Once a week</li> <li>2-3 times a week</li> <li>4-6 times a week</li> <li>Daily</li> <li>Multiple meals per day</li> </ul>                                                                  |
| Role         | Are you:                                                                       | Person | Categorical         |                                                                                                                                                                                                                                                                                                                                                   |
| Frequency    | How often do you eat in the dining hall?                                       | Person | Ordered categorical |                                                                                                                                                                                                                                                                                                                                                   |

---
